# Supplementary material for: The Ontogeny and Evolution of Sex-Biased Gene Expression in Drosophila melanogaster
Source: PubMed Central journal article supplement — Mol Biol Evol. 2014 Feb 12;31(5):1206–19. doi: 10.1093/molbev/msu072 (PMC3995337; doi:10.1093/molbev/msu072), 2014-02-12

Figure S1

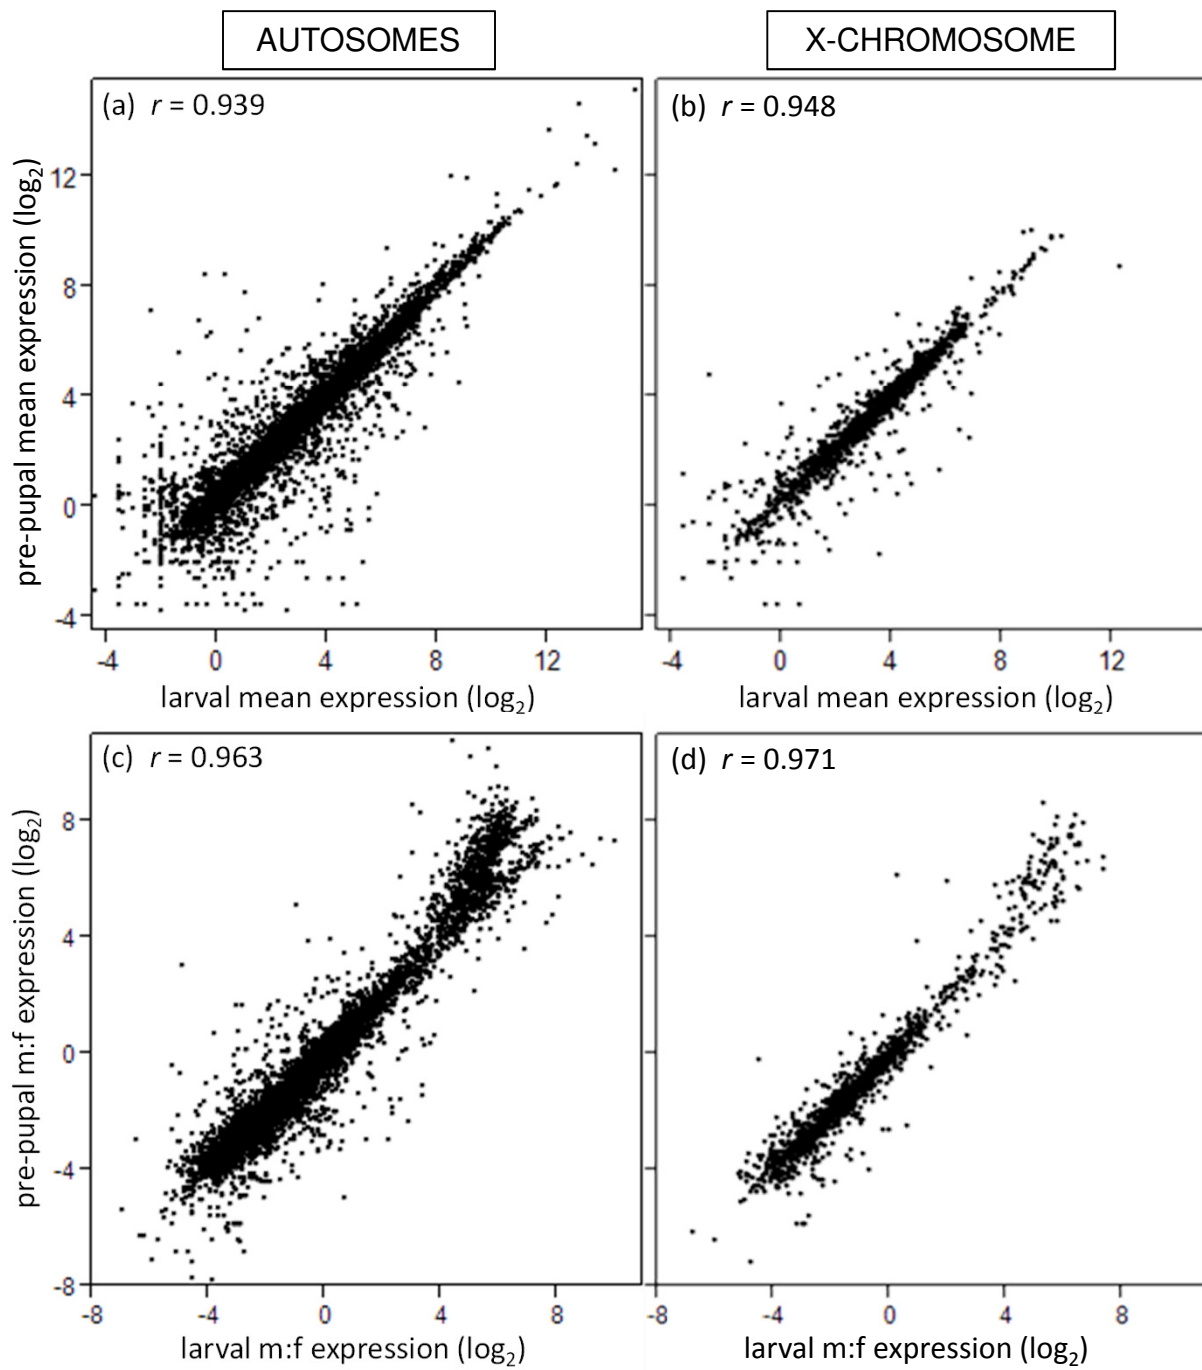

Figure S2

FEMALE-BIASED AUTOSOMAL GENES

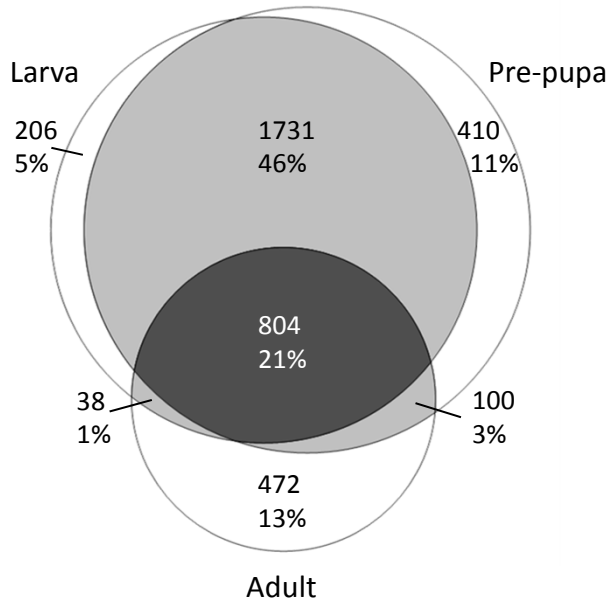

MALE-BIASED AUTOSOMAL GENES

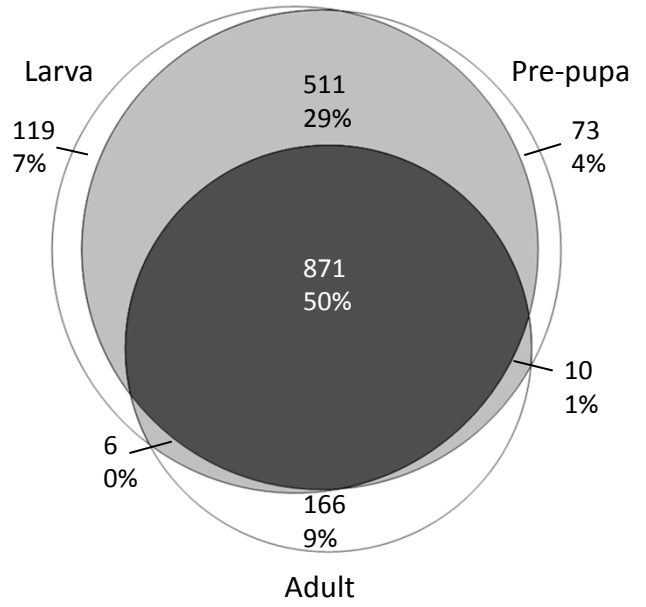

FEMALE-BIASED X-LINKED GENES

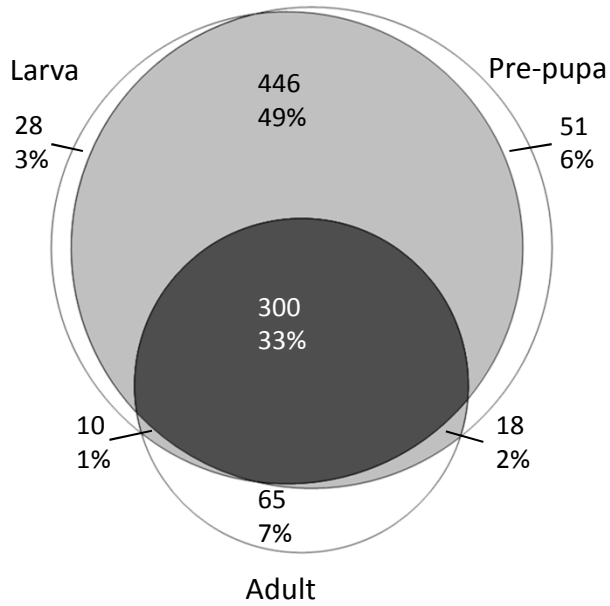

MALE-BIASED X-LINKED GENES

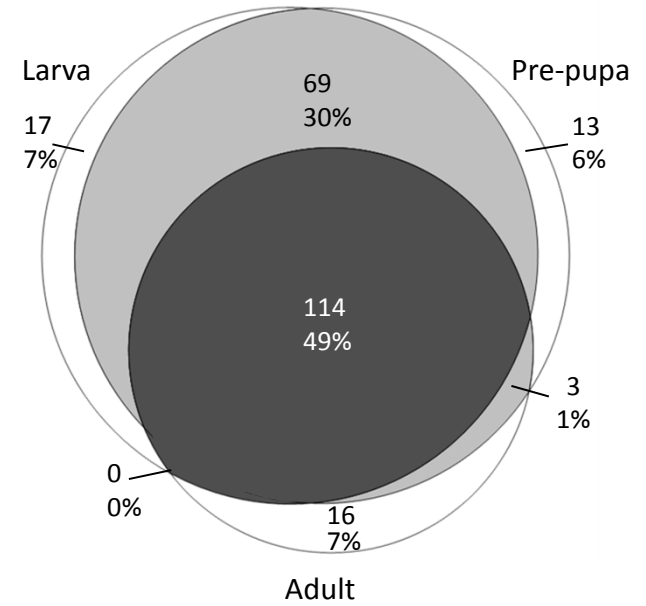

Figure S3

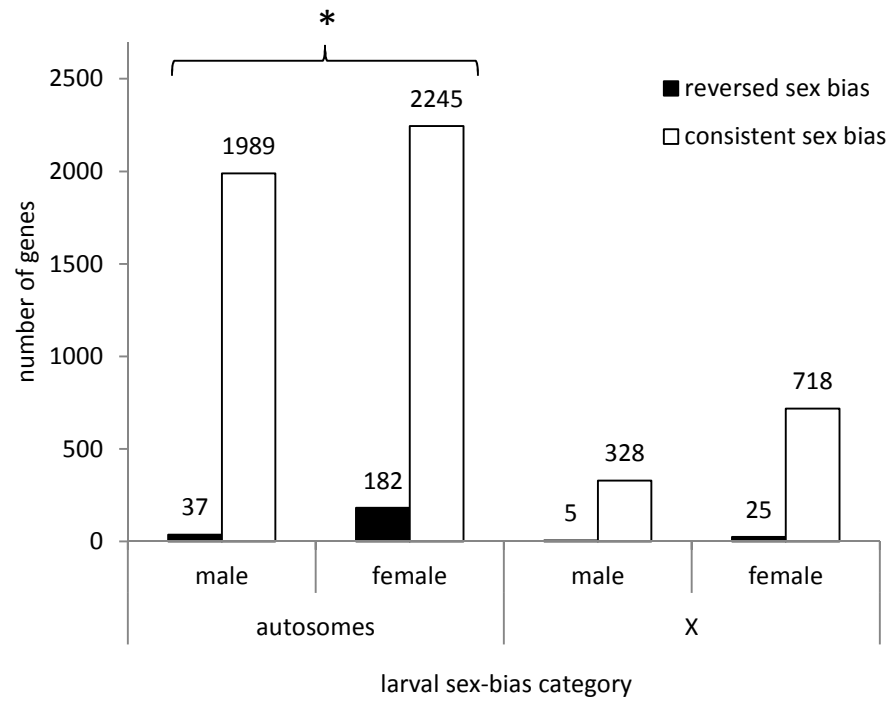

Figure S4

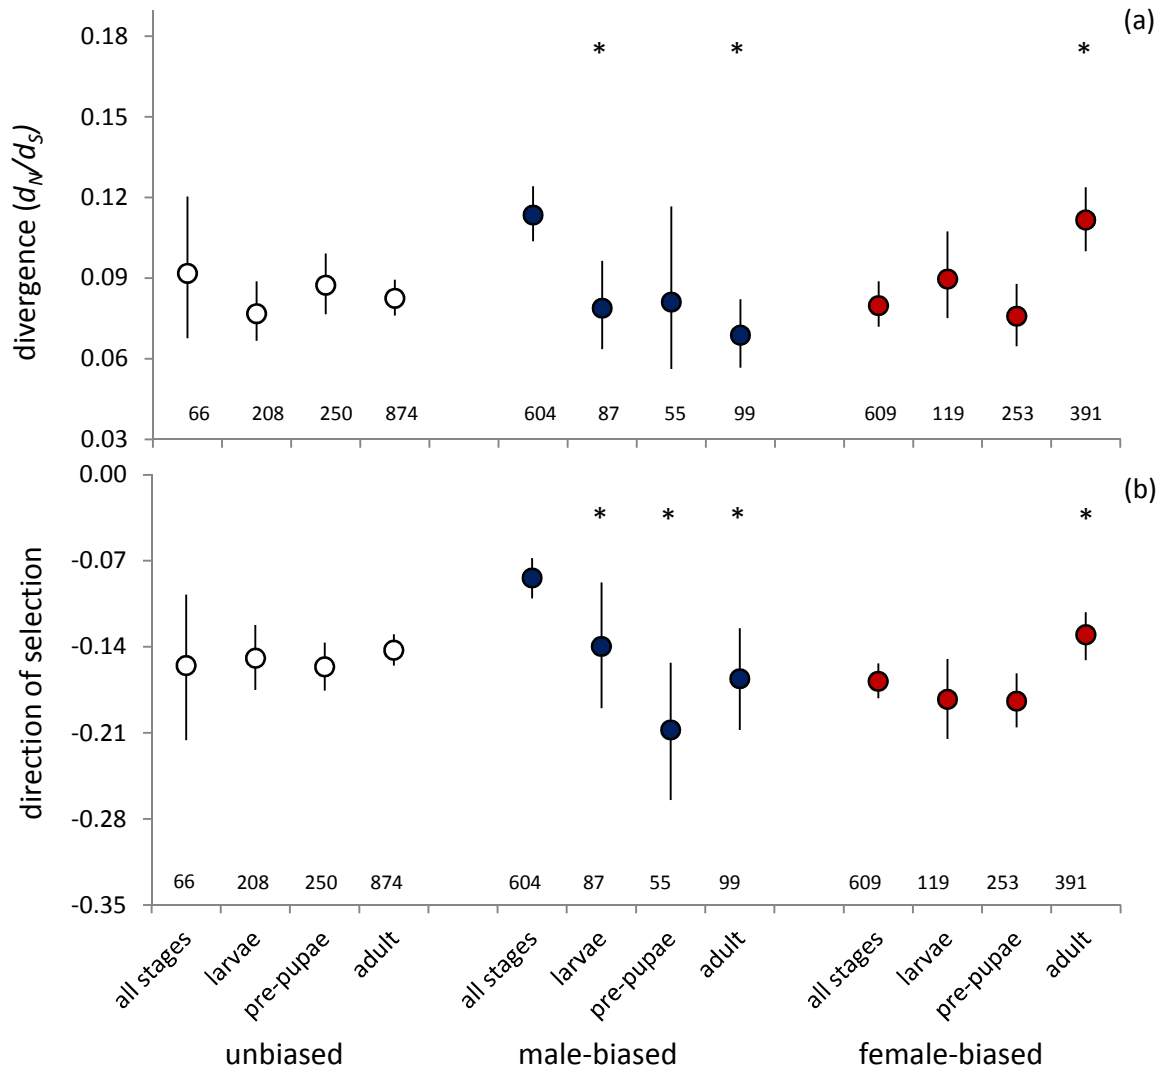

Supplement: supp_msu072_Supplementary_figs_revised.pdf [file supp_msu072_Supplementary_figs_revised.pdf]
